# Supplementary material
Source: MDPI journal article supplement (https://www.mdpi.com/2076-3263/12/9/328)
Supplement: s1 [file s1]

## Supplementary Materials

*Table S1: Estimated  $b$ -values for each region by applying the maximum likelihood estimate, along with the confidence interval level of residuals.*

| Zone | $b$  | Level of fit (%) |
|------|------|------------------|
| I    | 1.05 | 93.3             |
| II   | 0.93 | 93.4             |
| III  | 1.00 | 92.4             |
| IV   | 1.13 | 93.6             |
| V    | 0.98 | 96.5             |
| VI   | 0.96 | 92.4             |

*Table S2: Results of stacked fits of the RJ89 model within the designed seismic zones, using variable time windows (10, 60, 120 days) and mean ( $b=1.06$ ) or region-specific  $b$ -values through the maximum-likelihood estimation. Stacked fits of 60-day and mean  $b$ -value are illustrated in Figure 3 of the main article.*

| Days after $M_m$ | $b$      | Zone  |      |       |      |       |      |       |      |       |      |       |      |       |      |
|------------------|----------|-------|------|-------|------|-------|------|-------|------|-------|------|-------|------|-------|------|
|                  |          | All   |      | I     |      | II    |      | III   |      | IV    |      | V     |      | VI    |      |
|                  |          | a     | p    | a     | p    | a     | p    | a     | p    | a     | p    | a     | p    | a     | p    |
| 10               | Mean     | -1.67 | 0.83 | -1.43 | 1.63 | -1.36 | 0.82 | -1.83 | 0.56 | -1.84 | 0.90 | -1.58 | 1.02 | -1.82 | 1.17 |
|                  | Specific |       |      | -1.41 |      | -1.01 |      | -1.66 |      | -2.04 |      | -1.35 |      | -1.35 |      |
| 60               | Mean     | -1.66 | 0.86 | -1.45 | 1.74 | -1.32 | 1.06 | -1.79 | 0.65 | -1.83 | 0.94 | -1.57 | 1.06 | -1.82 | 1.12 |
|                  | Specific |       |      | -1.43 |      | -0.97 |      | -1.61 |      | -2.02 |      | -1.34 |      | -1.36 |      |
| 120              | Mean     | -1.65 | 0.90 | -1.45 | 1.77 | -1.31 | 1.09 | -1.74 | 0.74 | -1.83 | 0.93 | -1.57 | 1.08 | -1.83 | 1.07 |
|                  | Specific |       |      | -1.43 |      | -0.96 |      | -1.56 |      | -2.03 |      | -1.33 |      | -1.38 |      |

*Table S3: Overview of the dataset used for the analysis. Date (columns 2-4), focal coordinates (columns 5-6), mainshock magnitude (column 7) and focal mechanism classification (column 8) of the mainshocks selected are shown. Column 9 indicates their relative placement among the designed zones and columns 10 and 11 show the aftershock duration ( $T_a$ ) and the relative productivity (RP) of their aftershock sequence, respectively.*

| No | Year | Month | Day | Lat (°) | Lon (°) | $M_w$ | FM   | Zone | $T_a$ | RP    |
|----|------|-------|-----|---------|---------|-------|------|------|-------|-------|
| 1  | 1995 | 5     | 13  | 40.160  | 21.670  | 6.5   | N    | V    | 318   | +0.80 |
| 2  | 1995 | 6     | 15  | 38.362  | 22.200  | 6.5   | N    | IV   | 437   | +0.11 |
| 3  | 1995 | 12    | 7   | 34.780  | 23.970  | 5.6   | R    | III  | -     | -0.84 |
| 4  | 1996 | 7     | 20  | 36.070  | 27.459  | 6.2   | N    | V    | -     | -0.67 |
| 5  | 1997 | 10    | 13  | 36.446  | 22.160  | 6.4   | R    | III  | 58    | -0.36 |
| 6  | 1997 | 11    | 5   | 38.395  | 22.452  | 5.6   | N-SS | IV   | -     | -0.44 |
| 7  | 1997 | 11    | 14  | 38.729  | 25.913  | 5.8   | SS-N | VI   | 117   | +0.37 |
| 8  | 1997 | 11    | 18  | 37.422  | 20.619  | 6.6   | R    | III  | 390   | +0.75 |
| 9  | 1998 | 4     | 29  | 35.961  | 21.880  | 5.5   | R-SS | III  | -     | -0.47 |
| 10 | 1999 | 9     | 7   | 38.062  | 23.537  | 6     | N    | V    | 407   | +0.42 |
| 11 | 2000 | 4     | 5   | 34.220  | 25.690  | 5.5   | R    | III  | -     | -0.07 |
| 12 | 2000 | 5     | 24  | 35.918  | 21.875  | 5.7   | R    | III  | 52    | +0.02 |

|    |      |    |    |        |        |     |      |     |     |       |
|----|------|----|----|--------|--------|-----|------|-----|-----|-------|
| 13 | 2000 | 5  | 26 | 38.922 | 20.640 | 5.5 | SS   | II  | -   | -0.23 |
| 14 | 2001 | 6  | 10 | 38.603 | 25.574 | 5.6 | SS   | VI  | -   | +0.70 |
| 15 | 2001 | 6  | 23 | 35.947 | 27.693 | 5.7 | SS   | III | -   | -0.91 |
| 16 | 2001 | 7  | 26 | 38.995 | 24.382 | 6.4 | SS   | VI  | 523 | +0.47 |
| 17 | 2002 | 1  | 22 | 35.634 | 26.628 | 6.1 | N    | V   | -   | -0.59 |
| 18 | 2002 | 12 | 2  | 37.790 | 21.081 | 5.6 | SS-N | III | -   | +0.55 |
| 19 | 2003 | 4  | 10 | 38.255 | 27.169 | 5.7 | SS-N | V   | 79  | +0.02 |
| 20 | 2003 | 8  | 14 | 38.744 | 20.539 | 6.2 | SS-N | II  | 312 | +0.80 |
| 21 | 2003 | 10 | 17 | 35.998 | 22.396 | 5.5 | R    | III | -   | -0.59 |
| 22 | 2004 | 3  | 17 | 34.779 | 23.397 | 6   | SS   | III | -   | -1.12 |
| 23 | 2004 | 8  | 4  | 36.902 | 27.772 | 5.5 | N    | V   | -   | +0.71 |
| 24 | 2004 | 10 | 7  | 36.55  | 26.796 | 5.5 | R-SS | V   | -   | -0.77 |
| 25 | 2005 | 10 | 17 | 38.097 | 26.881 | 5.8 | SS   | V   | 300 | +0.93 |
| 26 | 2005 | 10 | 18 | 37.768 | 21.007 | 5.7 | R    | III | 96  | +0.29 |
| 27 | 2005 | 10 | 20 | 38.124 | 26.768 | 5.8 | SS   | V   | -   | +1.03 |
| 28 | 2006 | 1  | 8  | 36.174 | 23.334 | 6.7 | R-SS | V   | 154 | -0.33 |
| 29 | 2006 | 3  | 14 | 37.831 | 19.857 | 5.5 | SS   | II  | -   | -0.77 |
| 30 | 2006 | 4  | 12 | 37.643 | 20.981 | 5.7 | R-SS | III | 187 | +0.98 |
| 31 | 2007 | 1  | 18 | 34.724 | 22.402 | 5.7 | R    | III | -   | -0.91 |
| 32 | 2007 | 3  | 25 | 38.364 | 20.340 | 5.7 | SS-R | II  | 71  | +0.88 |
| 33 | 2007 | 5  | 21 | 34.602 | 26.961 | 5.5 | R    | III | -   | -0.77 |
| 34 | 2008 | 1  | 6  | 37.139 | 22.726 | 6.2 | R-SS | V   | -   | -1.09 |
| 35 | 2008 | 2  | 4  | 38.101 | 21.985 | 5.5 | N    | IV  | -   | -0.23 |
| 36 | 2008 | 2  | 14 | 36.575 | 21.868 | 6.8 | R    | III | 168 | +0.64 |
| 37 | 2008 | 3  | 28 | 34.938 | 25.322 | 5.5 | R    | V   | -   | -0.60 |
| 38 | 2008 | 6  | 8  | 37.952 | 21.537 | 6.4 | SS   | IV  | 500 | +0.36 |
| 39 | 2008 | 6  | 21 | 36.108 | 21.929 | 5.6 | R    | III | 66  | +0.56 |
| 40 | 2008 | 7  | 15 | 35.832 | 28.034 | 6.4 | SS-N | III | -   | -0.17 |
| 41 | 2009 | 2  | 16 | 37.077 | 20.749 | 5.5 | R-SS | III | 110 | -0.37 |
| 42 | 2009 | 7  | 1  | 34.042 | 25.411 | 6.4 | R    | III | 278 | +0.17 |
| 43 | 2009 | 11 | 3  | 37.349 | 20.176 | 5.8 | R    | III | 367 | -0.98 |
| 44 | 2010 | 1  | 18 | 38.404 | 21.961 | 5.5 | N    | IV  | -   | +0.36 |
| 45 | 2010 | 8  | 22 | 37.389 | 20.145 | 5.5 | R    | III | 109 | -0.47 |
| 46 | 2011 | 4  | 1  | 35.646 | 26.569 | 6.1 | SS   | V   | -   | -1.19 |
| 47 | 2011 | 11 | 23 | 34.493 | 25.067 | 5.5 | N-SS | III | -   | -0.77 |
| 48 | 2012 | 4  | 16 | 36.646 | 21.497 | 5.8 | R    | III | -   | -0.81 |
| 49 | 2013 | 1  | 8  | 39.670 | 25.55  | 5.8 | SS   | VI  | 320 | -0.33 |
| 50 | 2013 | 6  | 15 | 34.464 | 25.011 | 6.3 | R    | III | 125 | -0.07 |
| 51 | 2013 | 10 | 12 | 35.471 | 23.281 | 6.8 | R    | III | 200 | -1.14 |
| 52 | 2014 | 1  | 26 | 38.154 | 20.287 | 6.1 | SS   | II  | 395 | +0.65 |
| 53 | 2014 | 5  | 24 | 40.286 | 25.375 | 6.9 | SS   | VI  | 258 | -0.51 |
| 54 | 2014 | 8  | 29 | 36.685 | 23.706 | 5.8 | SS   | V   | -   | -0.98 |
| 55 | 2015 | 4  | 16 | 35.146 | 26.888 | 6.1 | R-SS | III | 227 | +0.06 |
| 56 | 2015 | 11 | 17 | 38.673 | 20.53  | 6.5 | SS-R | II  | 525 | +0.05 |
| 57 | 2016 | 5  | 25 | 34.918 | 26.261 | 5.7 | N    | III | -   | -0.91 |
| 58 | 2016 | 10 | 15 | 39.786 | 20.723 | 5.5 | R    | I   | -   | 0.46  |

|    |      |    |    |        |        |     |      |     |     |       |
|----|------|----|----|--------|--------|-----|------|-----|-----|-------|
| 59 | 2017 | 6  | 12 | 38.849 | 26.305 | 6.4 | N    | VI  | 310 | -0.12 |
| 60 | 2017 | 7  | 20 | 36.959 | 27.453 | 6.6 | N    | V   | 428 | +0.07 |
| 61 | 2018 | 6  | 25 | 36.651 | 21.35  | 5.5 | SS   | III | -   | -0.17 |
| 62 | 2018 | 9  | 27 | 36.659 | 21.369 | 5.5 | SS-N | III | -   | -0.77 |
| 63 | 2018 | 10 | 25 | 37.39  | 20.625 | 6.8 | R-SS | III | 391 | +0.47 |
| 64 | 2020 | 1  | 30 | 35.377 | 27.795 | 5.5 | N    | III | -   | -0.37 |
| 65 | 2020 | 1  | 30 | 35.198 | 27.819 | 5.8 | N-SS | III | -   | -0.28 |
| 66 | 2020 | 3  | 21 | 39.304 | 20.621 | 5.7 | R    | I   | 95  | -0.61 |
| 67 | 2020 | 5  | 2  | 34.551 | 25.614 | 6.6 | R    | III | 91  | -0.57 |
| 68 | 2020 | 6  | 28 | 36.683 | 28.249 | 5.5 | SS-R | V   | -   | -0.77 |
| 69 | 2020 | 9  | 18 | 34.984 | 25.256 | 6.1 | R    | V   | -   | -1.19 |
| 70 | 2020 | 10 | 30 | 37.911 | 26.814 | 7   | N    | V   | -   | +0.01 |
| 71 | 2021 | 2  | 17 | 38.357 | 21.957 | 5.5 | N    | IV  | -   | -0.47 |
| 72 | 2021 | 3  | 3  | 39.732 | 22.218 | 6.3 | N    | V   | -   | +0.28 |
| 73 | 2021 | 6  | 21 | 36.379 | 27.101 | 5.5 | N-SS | V   | -   | +0.01 |
